# Supplementary material
Source: publisher figshare collection journal article supplement (https://sage.figshare.com/ndownloader/files/23235374)
Supplement: Supplementary file 1 [file 23235374]

**Table 2. Results of Panel Data Analysis**

|                                | Trust in Central Government<br>(Central Trust) |        | Trust in Local Government<br>(Local Trust) |        |
|--------------------------------|------------------------------------------------|--------|--------------------------------------------|--------|
| <i>Fiscal Decentralization</i> |                                                |        |                                            |        |
| Fiscal Autonomy Index (Δ)      | .010                                           | (.01)  | .017**                                     | (.02)  |
| Expenditure Decentralization   | 3.74                                           | (6.79) | 4.22                                       | (8.02) |
| <i>Government-level</i>        |                                                |        |                                            |        |
| Political Party                | -.024                                          | (.07)  | -.00004                                    | (.08)  |
| Unemployment Rate              | .036                                           | (.07)  | .003                                       | (.08)  |
| GRDP                           | -.007                                          | (.01)  | -.008                                      | (.01)  |
| ln(Population)                 | 1.45                                           | (1.21) | 1.17                                       | (1.44) |
| <i>N</i>                       | 62                                             |        | 62                                         |        |
| <i>F</i>                       | 0.49                                           |        | 0.41                                       |        |
| R-squared                      | .005                                           |        | .003                                       |        |
| Hausman Test                   | Fixed                                          |        | Fixed                                      |        |

*Note:* Standard errors reported in parentheses. *F* indicates the F-statistics and *N* is the number of observations.

\*p<.05, \*\*p<.01, \*\*\*p<.001

**Figure 1. Historical Changes in the Fiscal Autonomy Index**

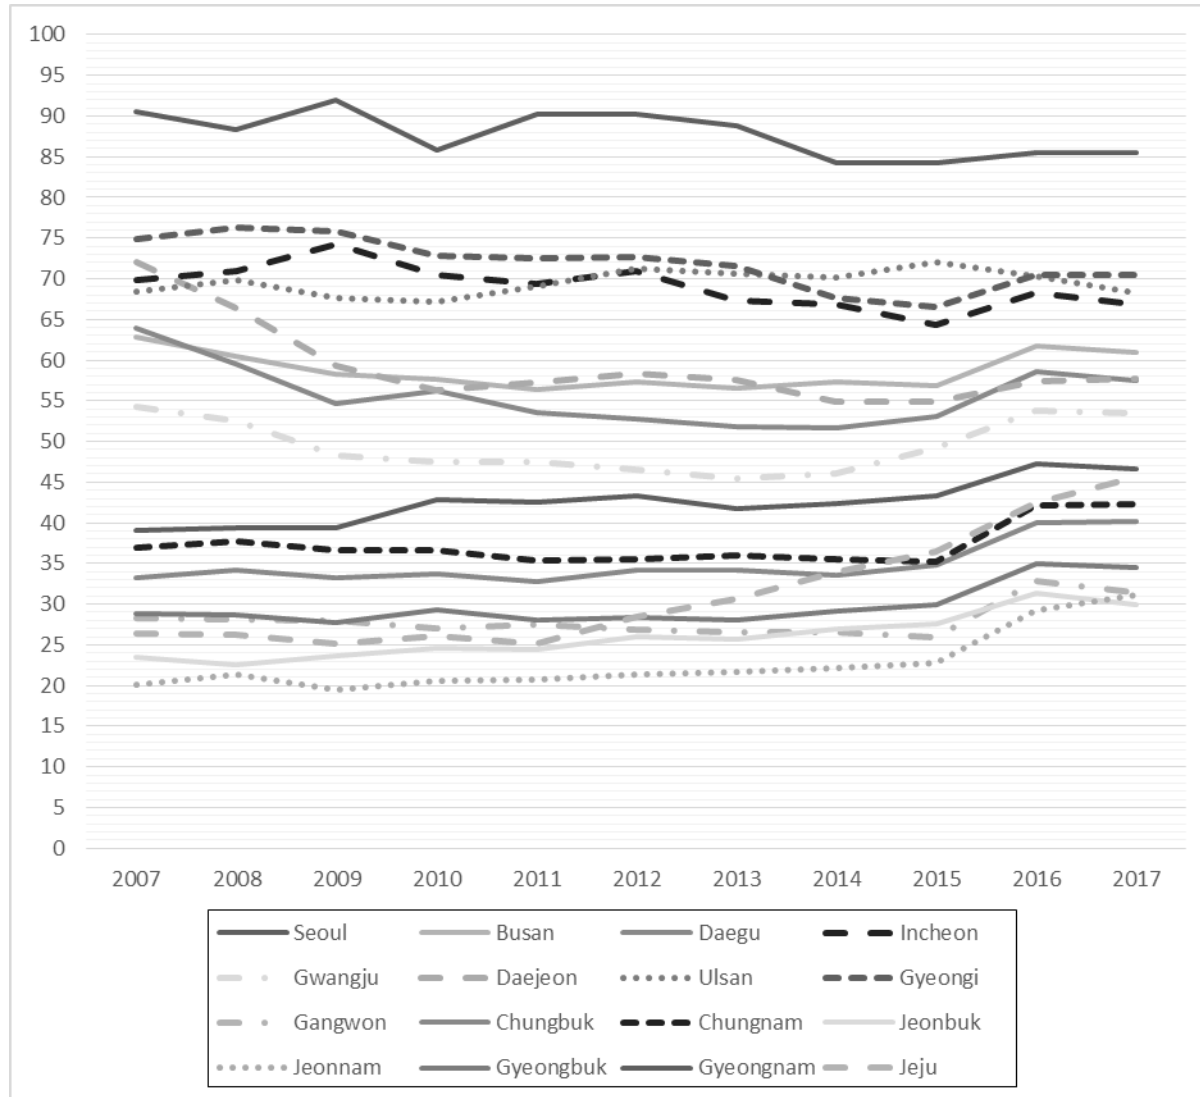

*Note:* Data was derived from Local Finance Integrated Open System

<http://lofin.mois.go.kr/portal/main.do>

## Appendix A. Descriptive Statistics and Measurement of Variables

| Variables                          | 2007             |                      | 2010             |                      | 2013             |                      | 2016            |                      |
|------------------------------------|------------------|----------------------|------------------|----------------------|------------------|----------------------|-----------------|----------------------|
|                                    | Mean<br>(SD)     | Range<br>(Min ~ Max) | Mean<br>(SD)     | Range<br>(Min ~ Max) | Mean<br>(SD)     | Range<br>(Min ~ Max) | Mean<br>(SD)    | Range<br>(Min ~ Max) |
| Fiscal Autonomy Index ( $\Delta$ ) | -.016<br>(.045)  | -.220~.064           | -2.84<br>(4.95)  | -13.20~6.18          | -.014<br>(.014)  | -.052~.074           | .032<br>(.033)  | .002~.11             |
| Expenditure Decentralization       | .109<br>(.069)   | .023~<br>.210        | .103<br>(.062)   | .022~.196            | .101<br>(.055)   | .023~.174            | .105<br>(.062)  | .024~.189            |
| Gender                             | .493<br>(.500)   | 0~1                  | .493<br>(.500)   | 0~1                  | .494<br>(.500)   | 0~1                  | .496<br>(.500)  | 0~1                  |
| Age                                | 43.17<br>(14.02) | 20~80                | 44.46<br>(13.88) | 20~79                | 45.40<br>(13.70) | 20~78                | 3.17<br>(1.41)  | 1~5                  |
| Education                          | 4.51<br>(1.31)   | 1~8                  | 4.46<br>(1.28)   | 1~8                  | 4.56<br>(1.14)   | 1~8                  | 4.75<br>(1.15)  | 1~8                  |
| Income                             | 5.86<br>(2.70)   | 1~13                 | 6.54<br>(2.59)   | 1~13                 | 8.18<br>(2.87)   | 1~15                 | 7.74<br>(2.51)  | 1~13                 |
| Ideology                           | 3.82<br>(1.33)   | 1~7                  | 5.21<br>(1.75)   | 0~10                 | 5.13<br>(1.65)   | 0~10                 | 5.18<br>(1.51)  | 1~10                 |
| PNEC                               | 2.05<br>(.764)   | 1~5                  | 2.38<br>(.913)   | 1~5                  | 2.16<br>(.780)   | 1~4                  | 2.33<br>(.766)  | 1~4                  |
| Political Party                    | .067<br>(.25)    | 0~1                  | .618<br>(.49)    | 0~1                  | .454<br>(.50)    | 0~1                  | .498<br>(.50)   | 0~1                  |
| Unemployment Rate                  | 3.23<br>(.816)   | 1.7~4.1              | 3.64<br>(.930)   | 1.8~5.1              | 3.13<br>(.723)   | 1.8~4.2              | 3.72<br>(.655)  | 2.1~4.9              |
| GRDP                               | 21.76<br>(5.46)  | 13.85~46.4           | 25.48<br>(7.20)  | 13.85~57.19          | 28.38<br>(7.75)  | 18.08~60.09          | 31.86<br>(7.75) | 20.15~60.96          |
| ln(Population)                     | 15.30<br>(.814)  | 13.23~16.22          | 15.26<br>(.892)  | 13.26~16.28          | 15.32<br>(.847)  | 13.29~16.32          | 15.33<br>(.857) | 13.37~16.36          |
| Trust in Central Government        | 2.20<br>(.659)   | 1~4                  | 2.32<br>(.683)   | 1~4                  | 2.29<br>(.649)   | 1~4                  | 2.30<br>(.669)  | 1~4                  |
| Trust in Local Government          | 2.19<br>(.666)   | 1~4                  | 2.43<br>(.680)   | 1~4                  | 2.37<br>(.718)   | 1~4                  | 2.25<br>(.707)  | 1~4                  |

Note: *Gender* was recorded as a dummy variable (1 = *male*, 0 = *female*). *Age* was measured as numerical values (more than 20 years old). *Education* was measured using the question: “What is the highest level of education you have completed?” (0 = *less than primary school*, 9 = *more than doctorate degree*). *Income* was applied as a continuous variable (average monthly household income). *Ideology* was about a respondent’s liberal-versus-conservative political ideology, measured on a standard 7-point scale, with larger values indicating more conservative identification. *PNEC* was measured with the question: “What do you think about current national economic conditions?” and then measured with a 5-point Likert scale, ranging 1 = *very bad* to 5 = *very good*. *Political Party* of local leaders was coded “1” if the local leader in each government was involved in a ruling party; or coded “0” if otherwise. *Unemployment* was measured as an unemployment rate of local government each year. *GRDP* was recorded as the value of gross regional domestic product (in million won) in localities each year. Lastly, *Population* was measured as a natural log term of total residents in each local government.
